# Supplementary material for: Genome wide association study of a Circadian Imbalance Index in 312,935 European ancestry UK Biobank participants identifies loci related to diabetes, mood and myocardial infarction
Source: Research Square preprint supplement (doi:10.21203/rs.3.rs-8329341/v1), 2025-12-12
Supplement: Supplementary file 1 [file 1e454ab7c8425d20e9763019.docx]

# Supplementary Figures for the manuscript “Genome wide association analysis of a composite Circadian Imbalance Index and its effect modification by sex and shift work in European ancestry UK Biobank participants”


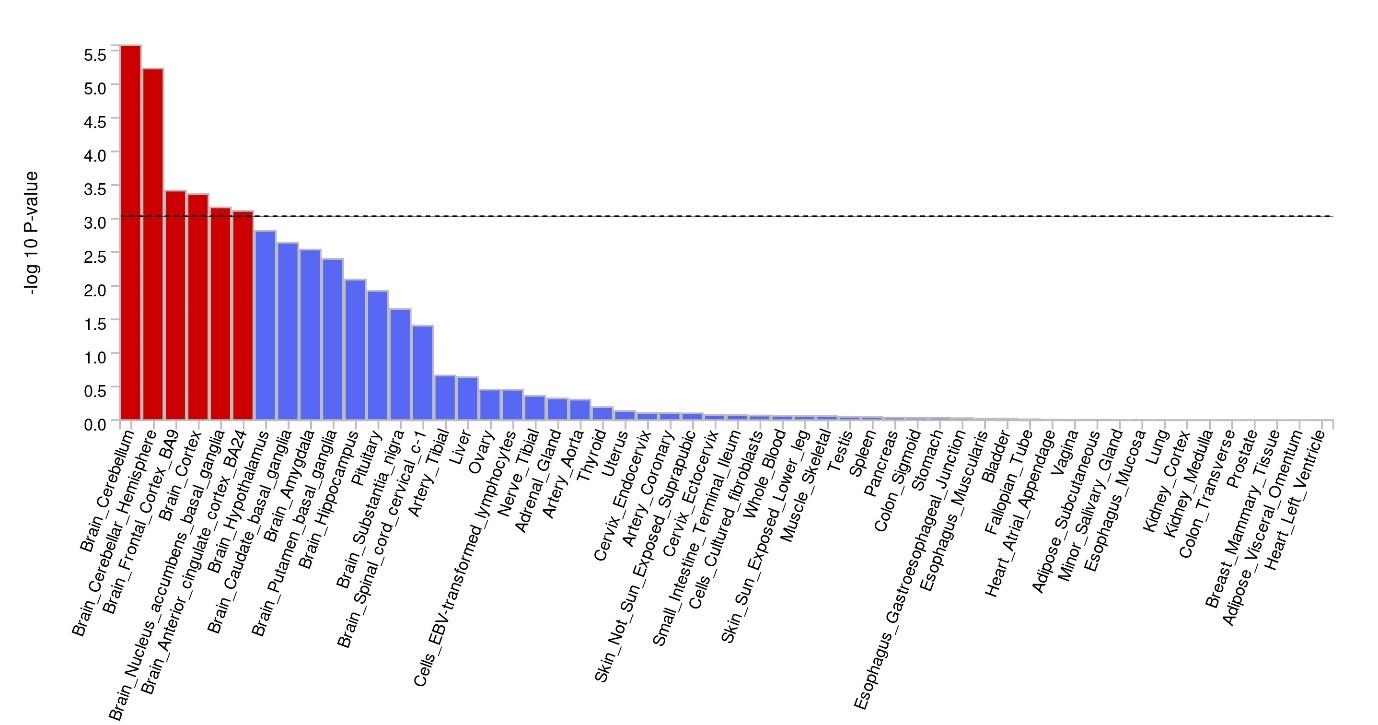


**Supplementary Fig.1:** MAGMA Tissue Expression analysis of the CII


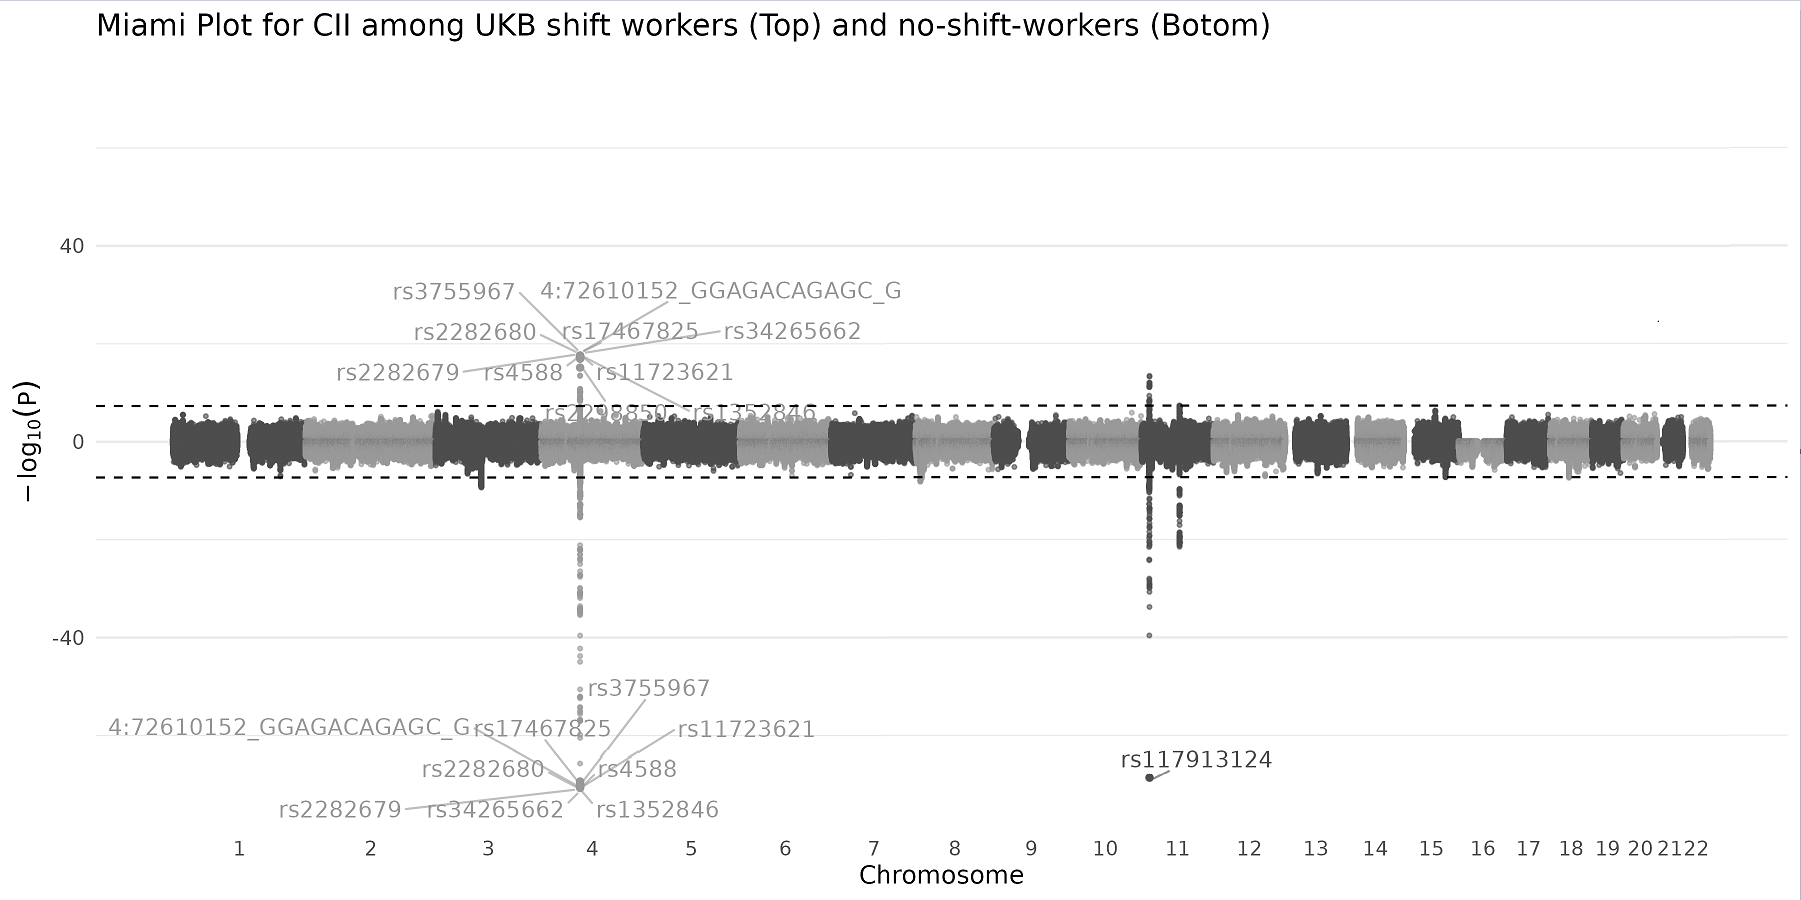


**(A)**

**Supplementary Fig. 2:** Miami plot of CII-GWASs results for European ancestry UKB participants: shift workers (N=28,976; top) versus no-shift-workers (N=154,262; bottom).

**Supplementary Fig. 3:** Manhattan plot of –log10(p) values for lead SNPs from the SNP × shift work interaction (SWint) and corresponding results in shift workers (SW; N=28,976) versus no-shift-workers (noSW; N=154,262).


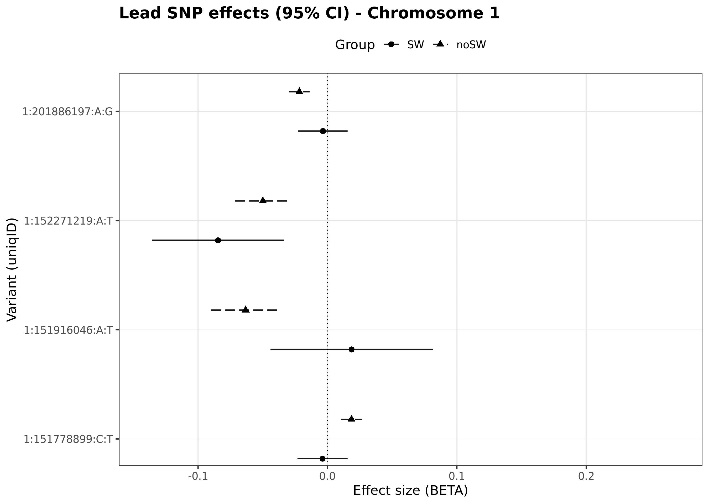

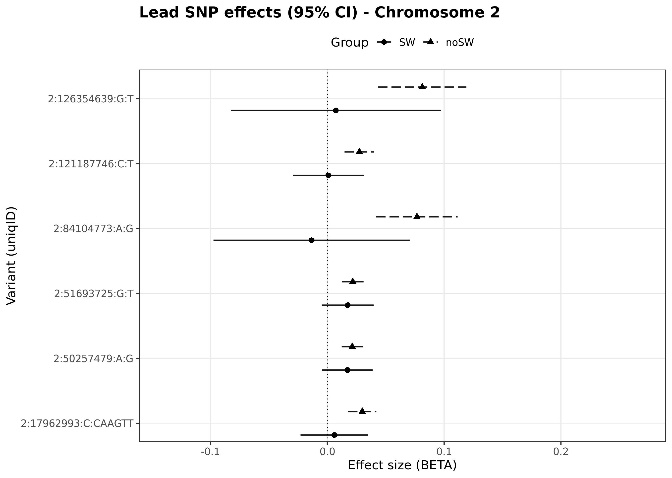

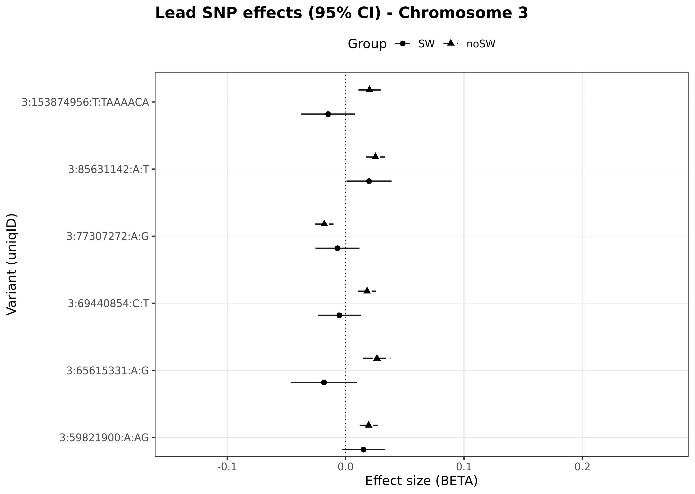

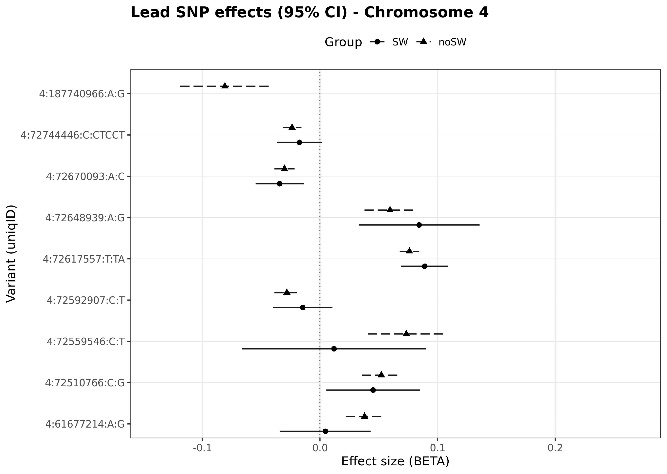

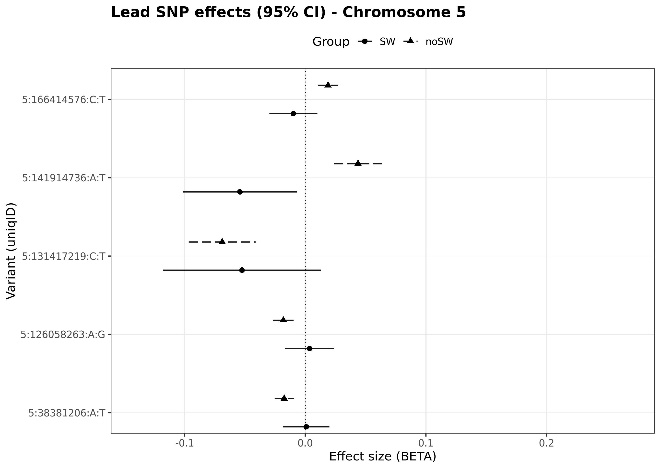

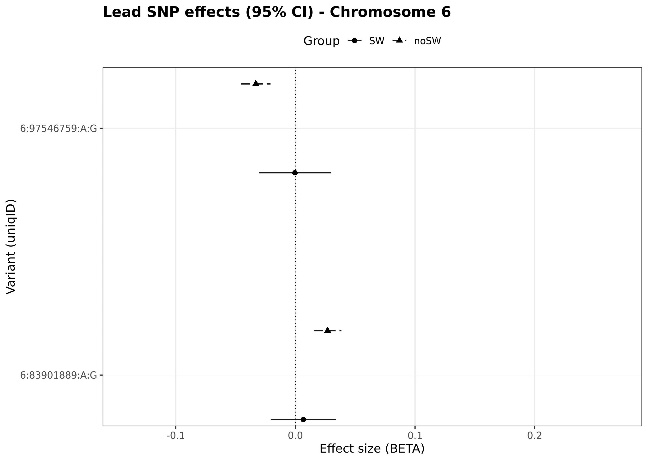

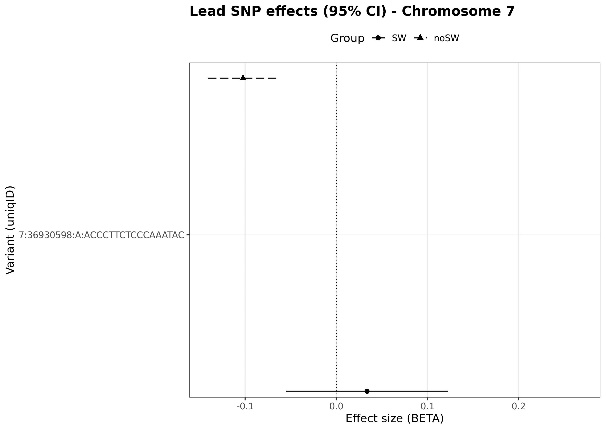

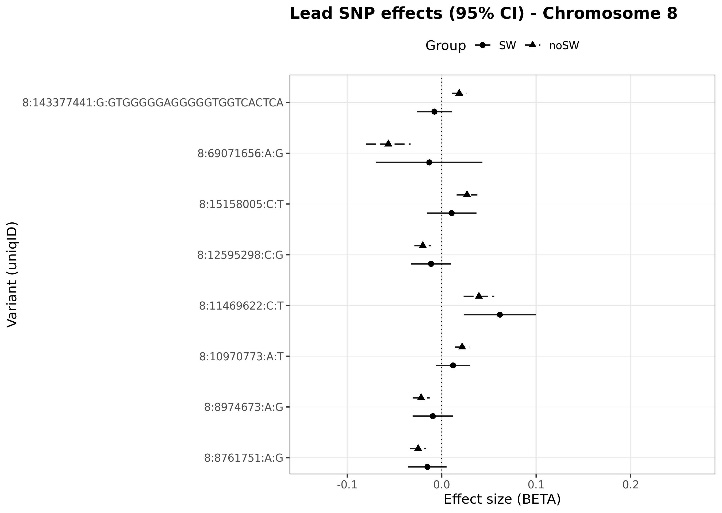

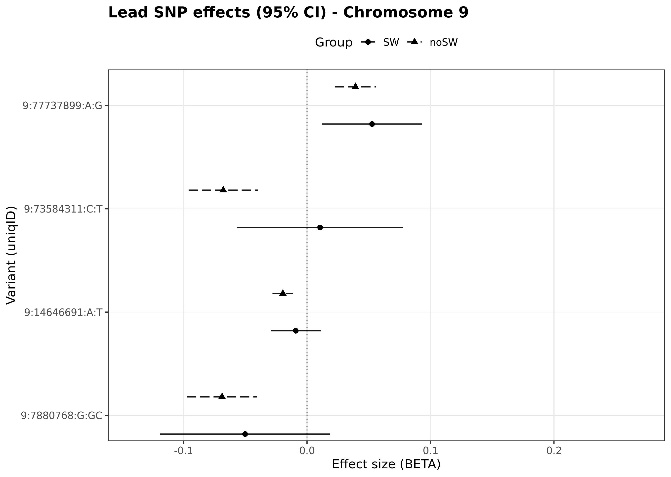

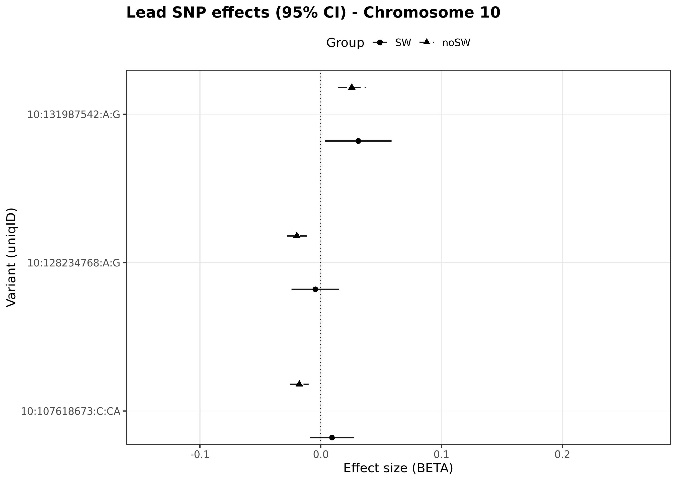

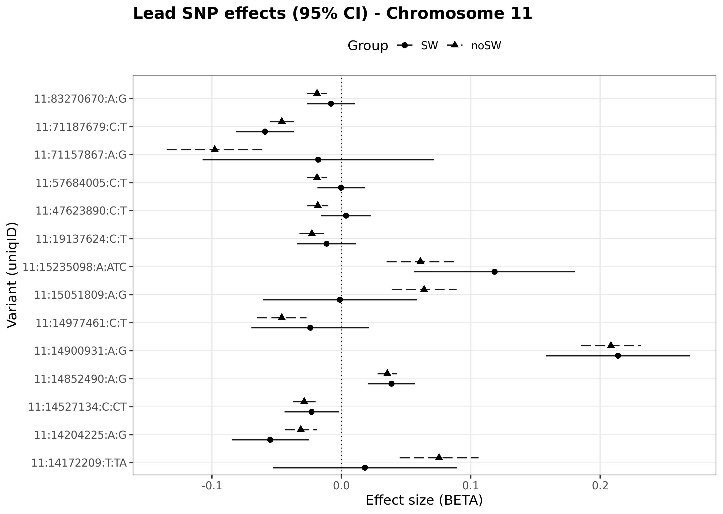

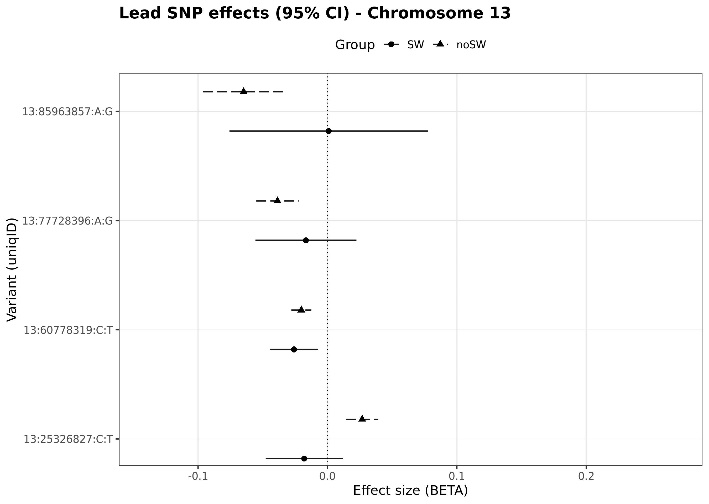

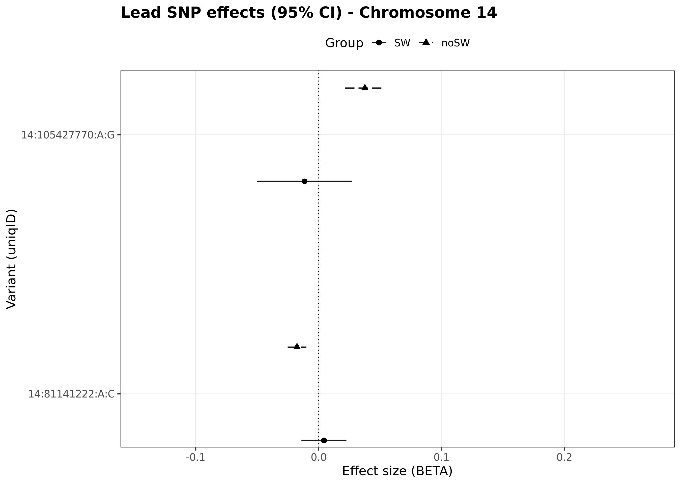

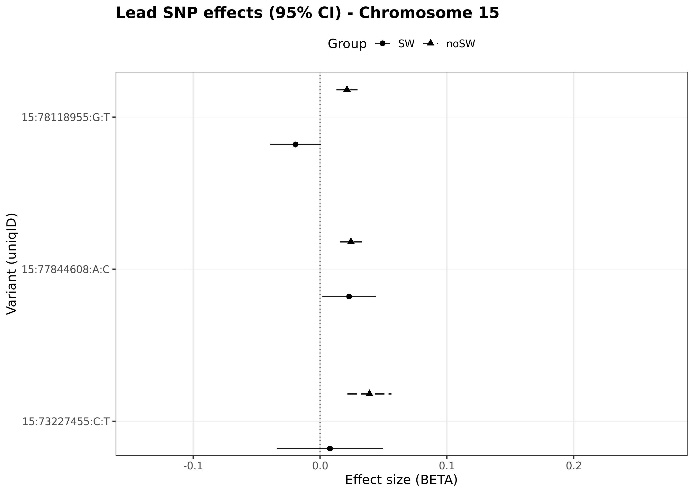

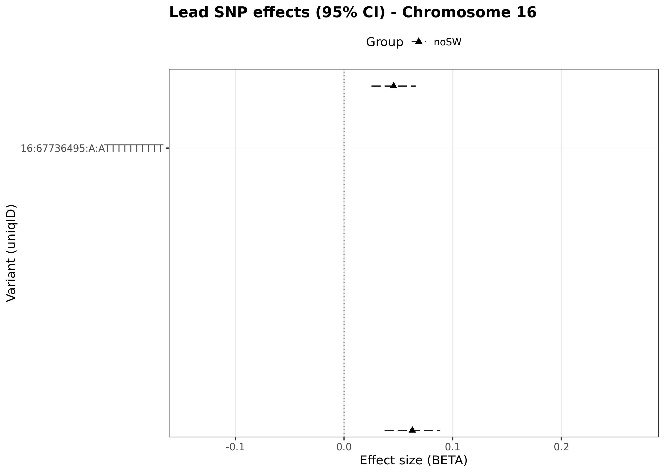

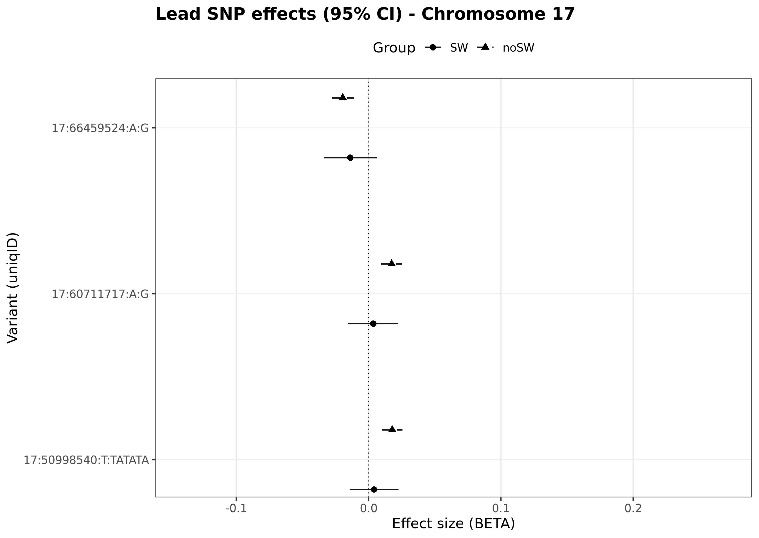

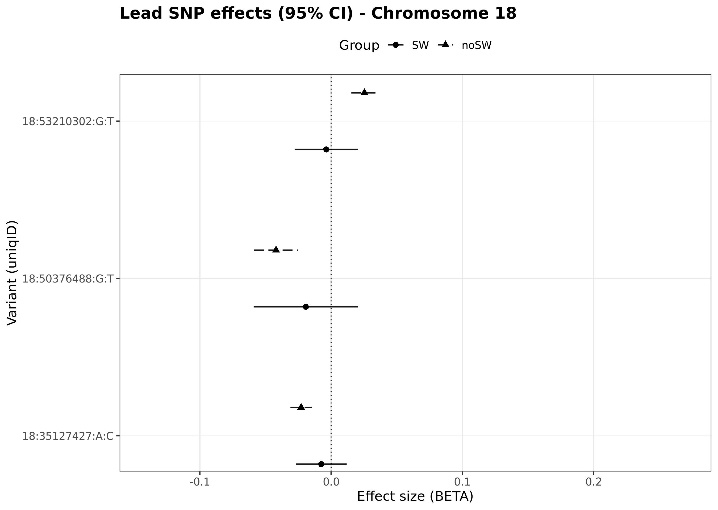

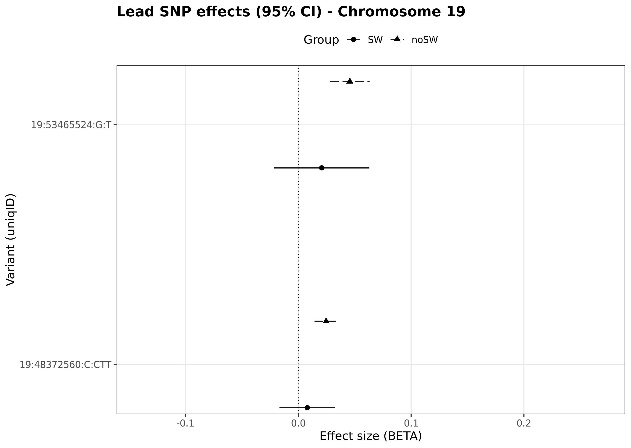

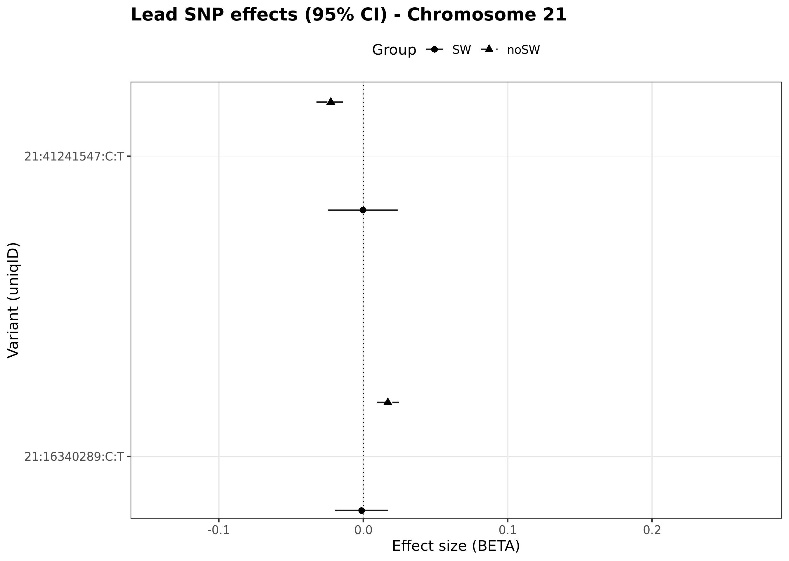


**Supplementary Fig. 4:** Shift-work status-specific GWAS effect sizes (95% CI) per chromosome for lead SNPs identified in SNP× Shift-work status interaction analysis of the CII.


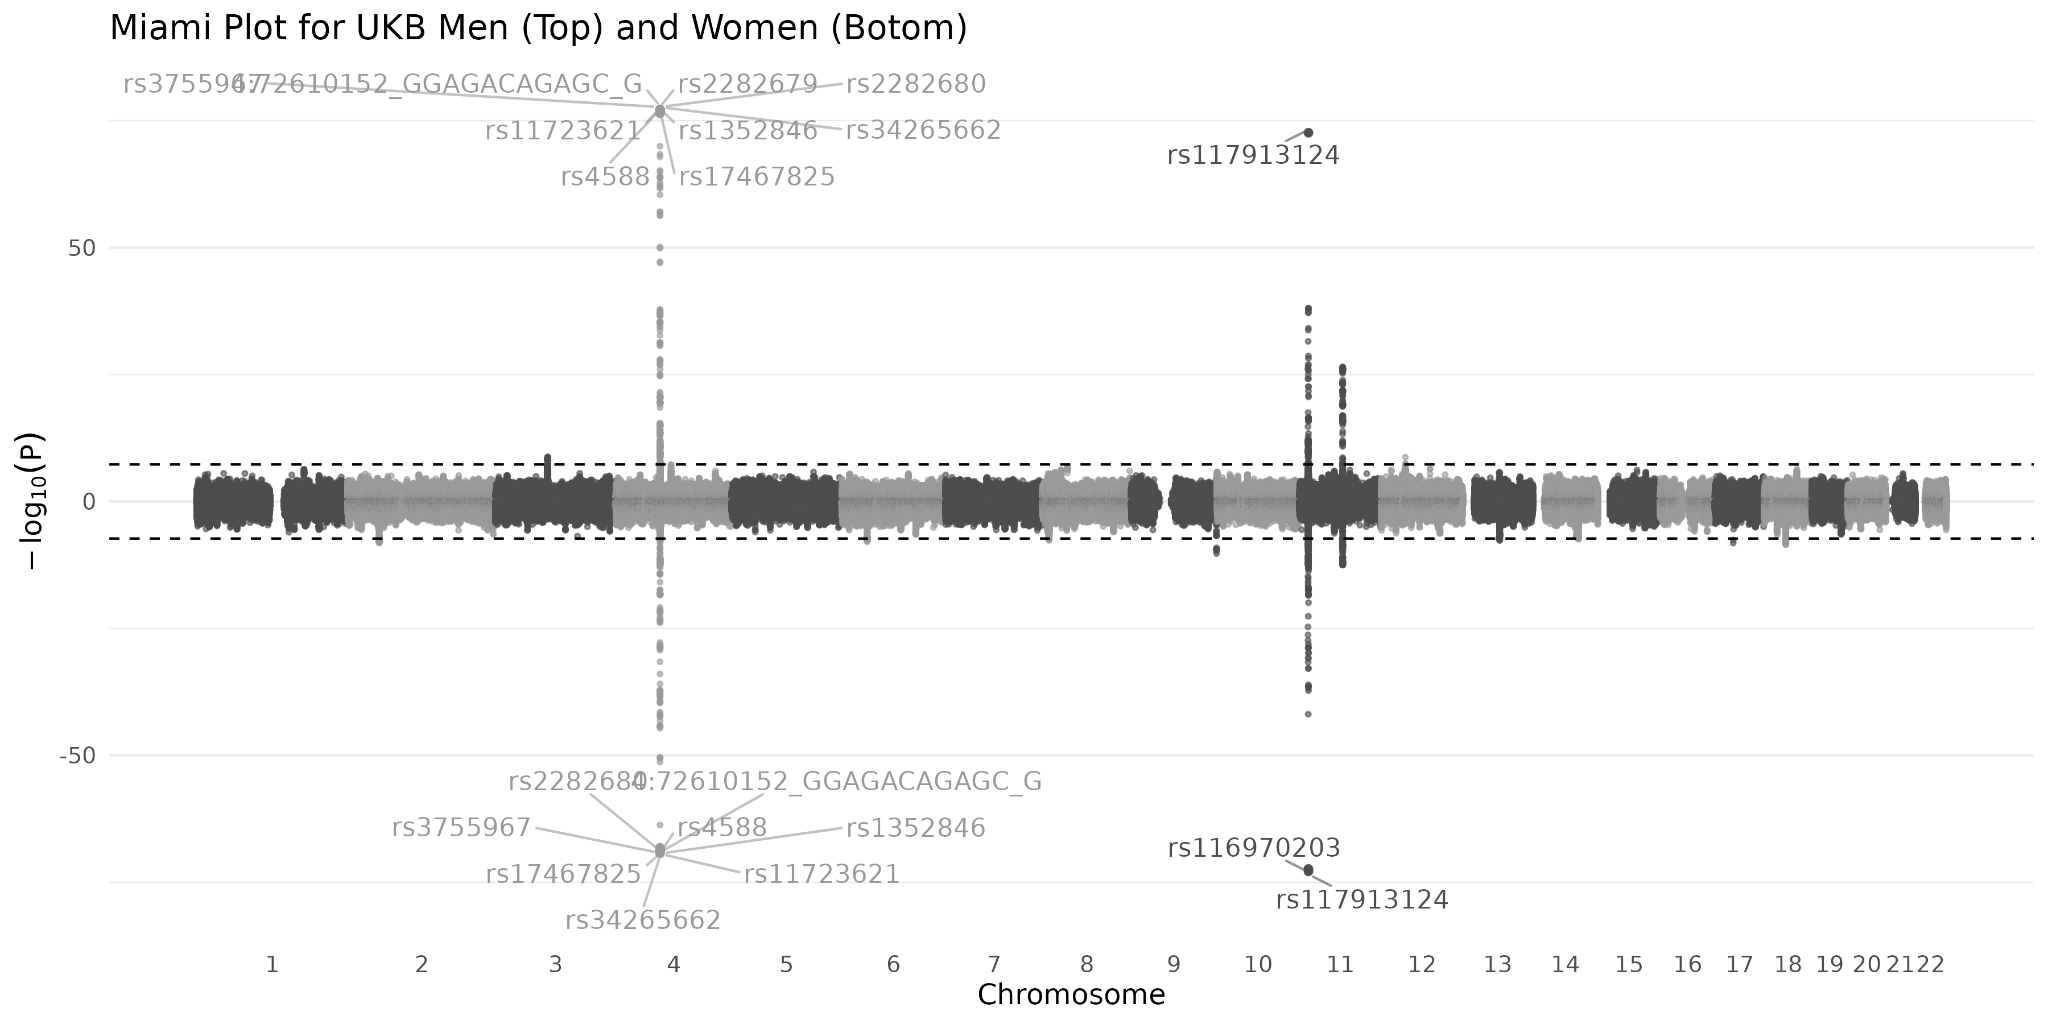


**(B)**

**Supplementary Fig. 5:** Miami plot of CII-GWASs results for European ancestry UKB participants: men (N=148,473) versus women (N= 164,462; bottom).


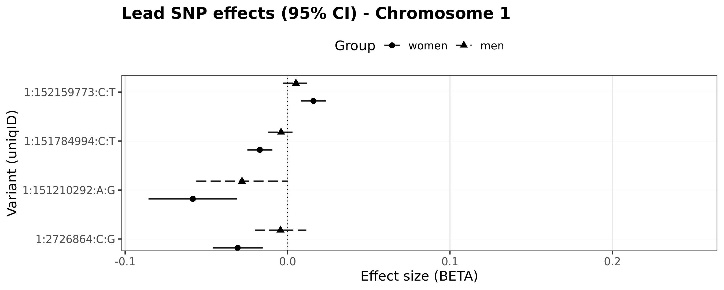

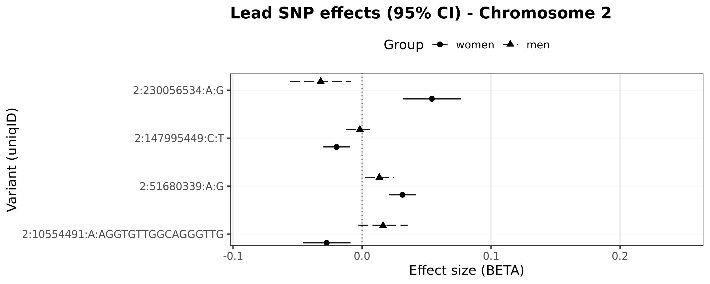

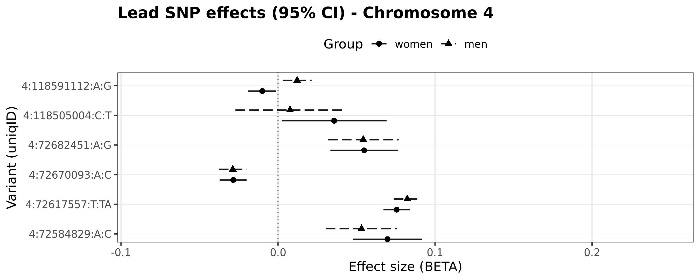

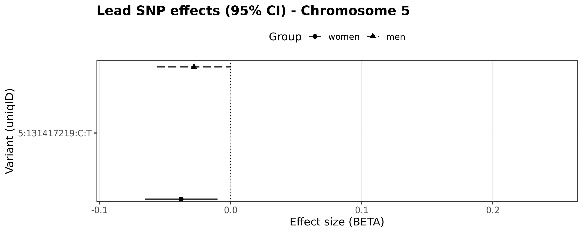

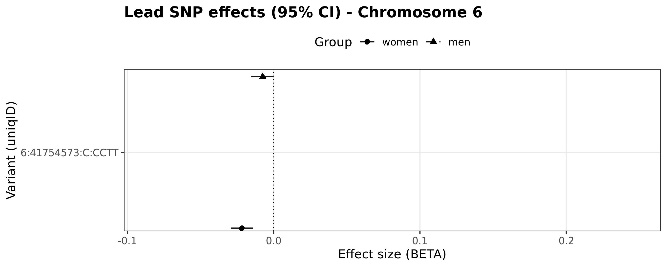

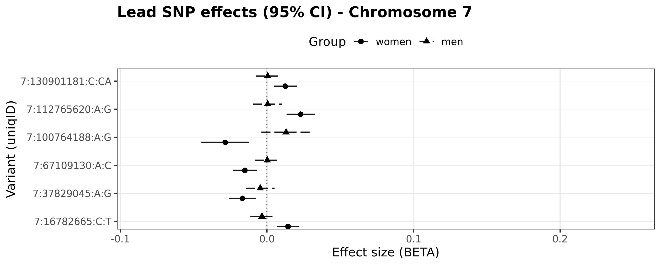

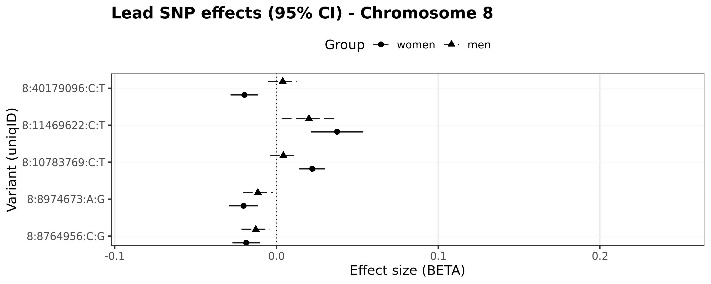

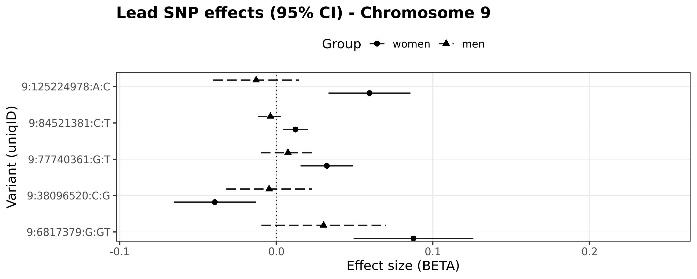

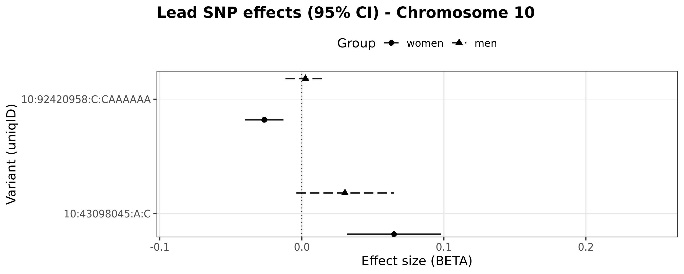

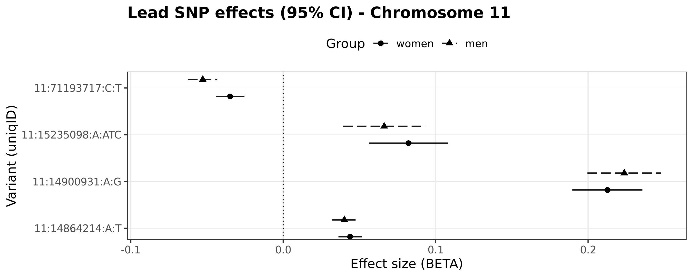

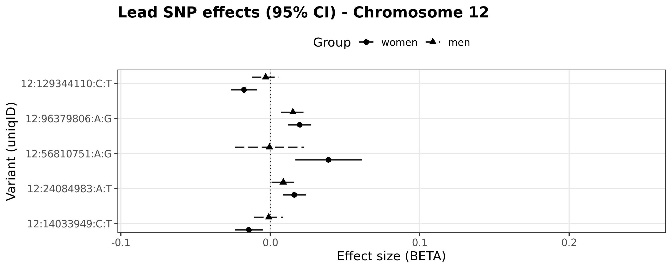

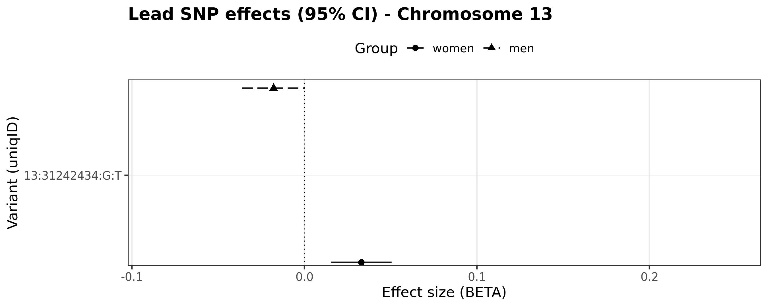

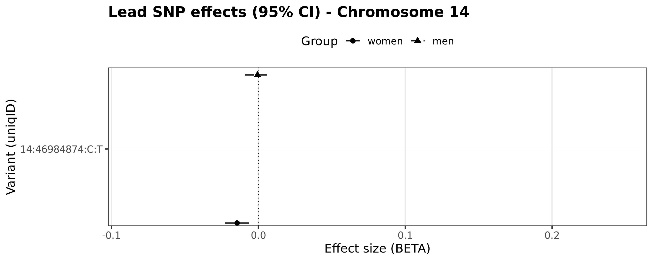

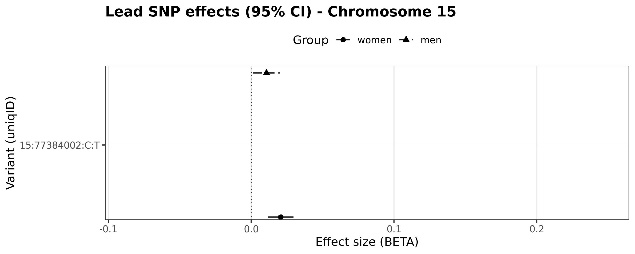

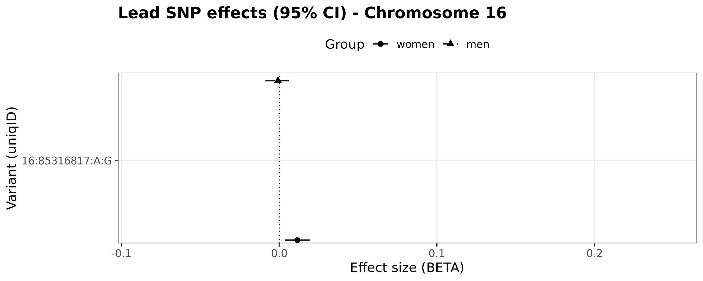

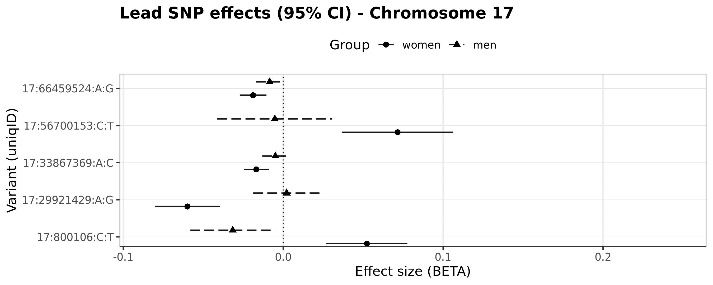

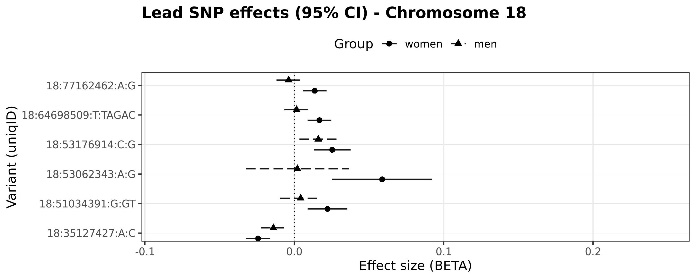

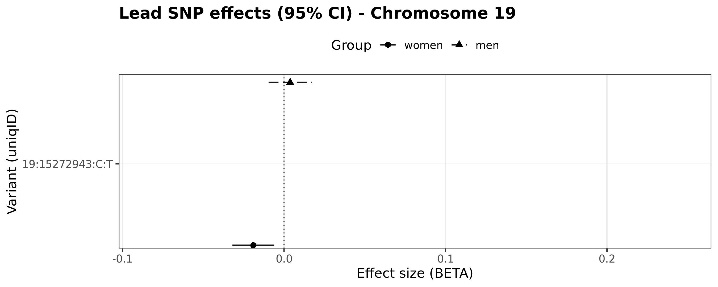

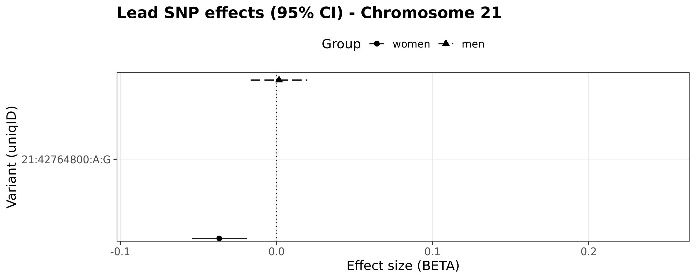


**Supplementary Fig. 6:** Sex-specific GWAS effect sizes (95% CI) per chromosome for lead SNPs identified in SNP×sex interaction analysis of the CII.


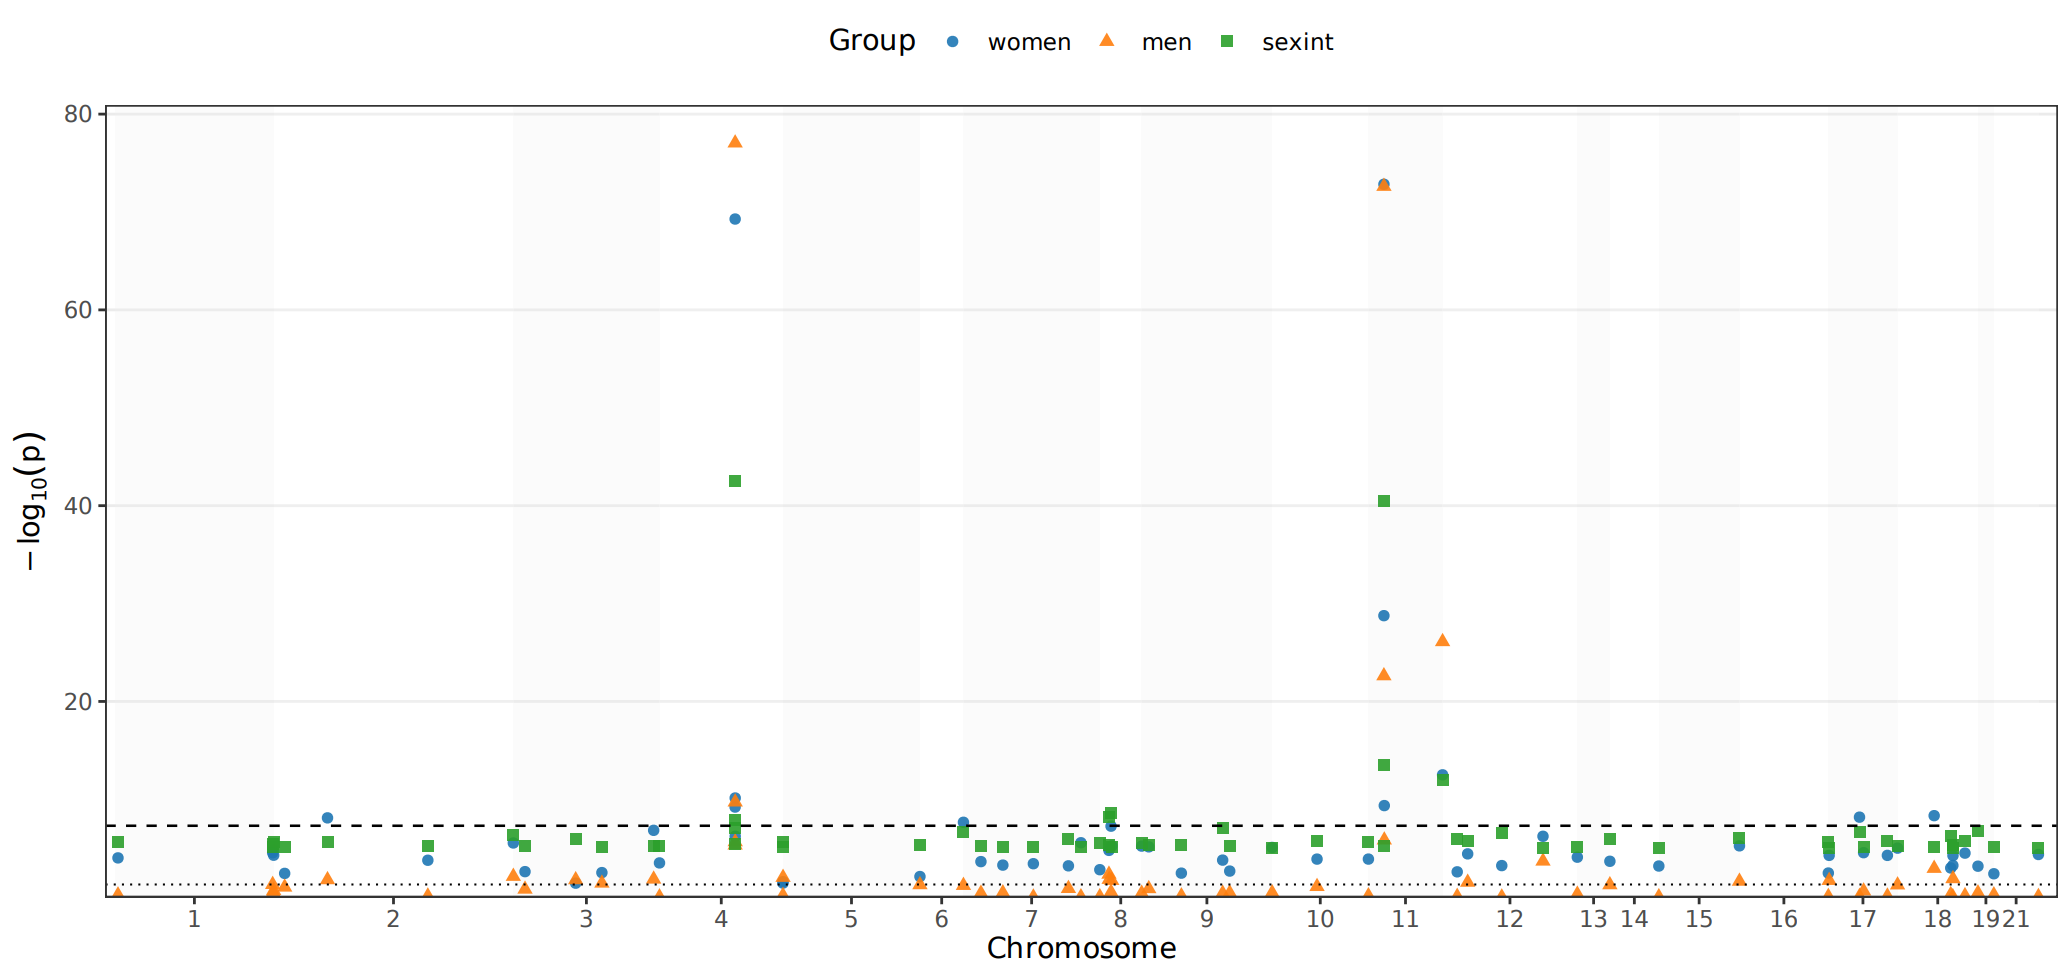
 **Supplementary Fig. 7:** Manhattan plot of –log10(p) values for lead SNPs from the SNP × sex (sexint) and corresponding results in UKB European ancestry men (N=148,473) and women (N= 164,462).


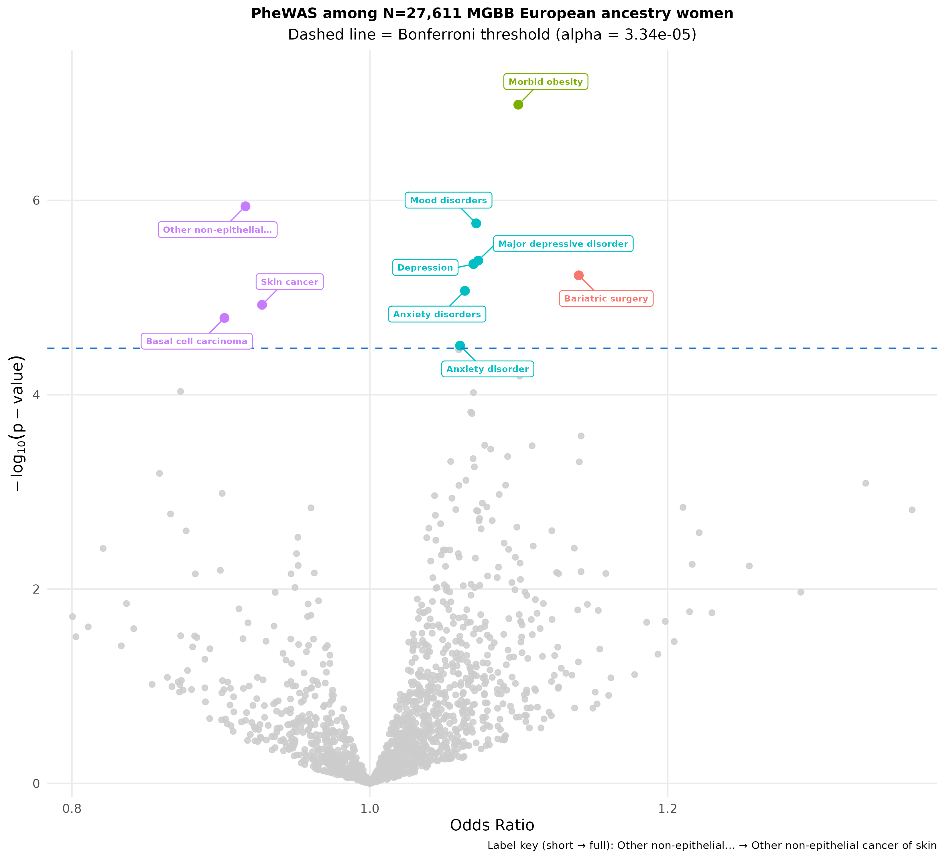


**(A)**


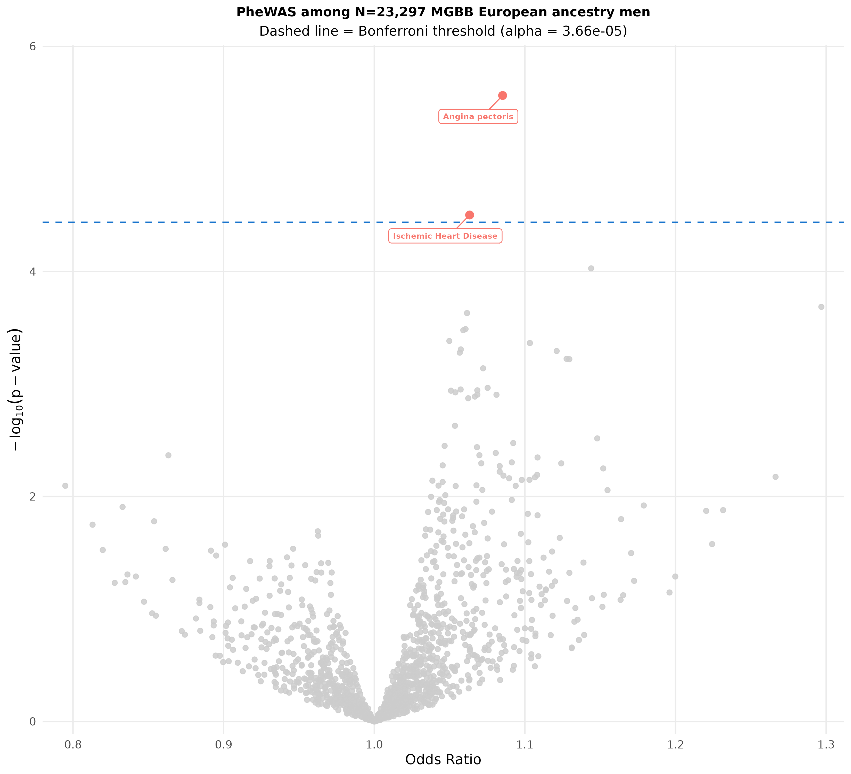


**(B)**

**Supplementary Fig. 8:** Results of the PheWAS analysis of the PRS-CS polygenic risk score for the CII (CII-PRS) among European ancestry MGB Biobank participants: **(A) women,** N=27,611; **(B) men,** N=23,297.
